# Supplementary material
Source: Royal Society of Chemistry journal article supplement (doi:10.1039/d5ta09511e)
Supplement: d5ta09511e1.pdf [file d5ta09511e1.pdf]

Supplementary information for

**Coupling Biomass Carbon Engineering with Phosphorus Chemistry for High-Performance Flexible Zinc-Ion Hybrid Supercapacitors**

*Himanshu Gupta*<sup>a</sup>, *Anusree S. Chandran*<sup>b</sup>, *Nishant Shukla*<sup>c</sup>, *Manikantan R. Nair*<sup>b</sup>,  
*Muruganandham Hariram*<sup>a</sup>, *Rudransh Dev*<sup>a</sup>, *Dinesh K. Shukla*<sup>d</sup>, *Vasant G. Sathe*<sup>d</sup>, *Manoj Kumar*<sup>a</sup>, *Tribeni Roy*<sup>b</sup>, *Debasish Sarkar*<sup>a,\*</sup>

<sup>a</sup>Department of Physics, Malaviya National Institute of Technology Jaipur, Rajasthan, 302017, India

<sup>b</sup> Department of Mechanical Engineering, Birla Institute of Technology and Science Pilani, Pilani, Rajasthan 333031, India

<sup>c</sup> Department of Physics, The Assam Kaziranga University, Jorhat, 785006, Assam, India

<sup>d</sup> UGC-DAE Consortium for Scientific Research, University Campus, Khandwa Road, Indore, 452001, India

\*Corresponding Authors

E-mail: [debasish.phy@mnit.ac.in](mailto:debasish.phy@mnit.ac.in) (D. Sarkar)

### Computation of specific capacity, energy and power densities for ZIHSC-

The specific capacitance ( $C_s$ , measured in F/g) is determined using the discharge data of the galvanostatic charge-discharge curves (GCD) and area of the CV curve through the application of the following equation:

$$\text{Specific capacitance: } C_s = \frac{i * \Delta t}{m * \Delta V} \text{ (using GCD curves)}$$

$$\text{Specific capacitance: } C_s = \frac{\int i(V) dV}{2 m * v * \Delta V} \text{ (using CV curves)}$$

Where  $i$  (A) is the current,  $\Delta t$  (s) is the discharge time for potential window  $\Delta V$  (V),  $m$  (g) is the mass of the active material on the cathode,  $\int i(V) dV$  is the area enclosed by the CV curve (A.V), and  $v$  is the scan rate (V/s).

The energy density (E, Wh/kg) and power density (W/kg) of ZIHSC are calculated using these equations:

$$\text{Energy density: } E = \frac{1}{2 * 3.6} C_s \Delta V^2$$

$$\text{Power density: } P = \frac{3600 * E}{\Delta t}$$

Where,  $C_s$  (F/g) is the specific capacitance,  $\Delta V$  (V) is the operating potential window, and  $\Delta t$  (s) is the discharge time.

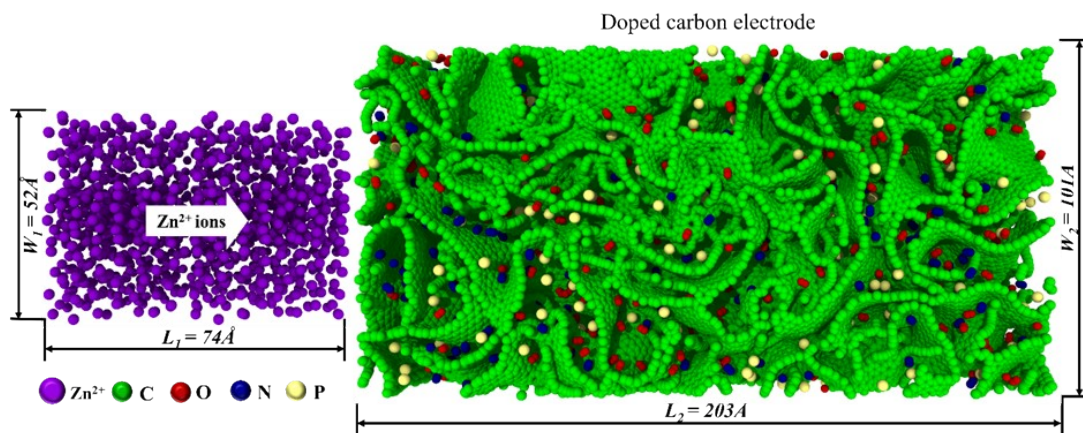

**Fig. S1** Snapshot of the simulation box packed with doped porous carbon electrode (right) and Zn<sup>2+</sup> ions (left) for the MD simulation.

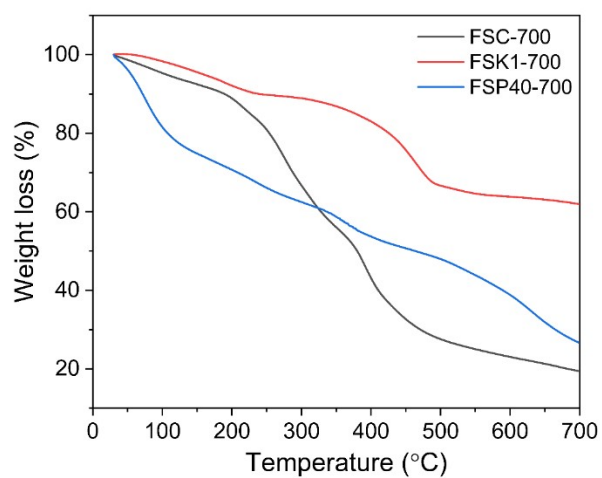

**Fig. S2** TGA of different FS-derived carbon samples.

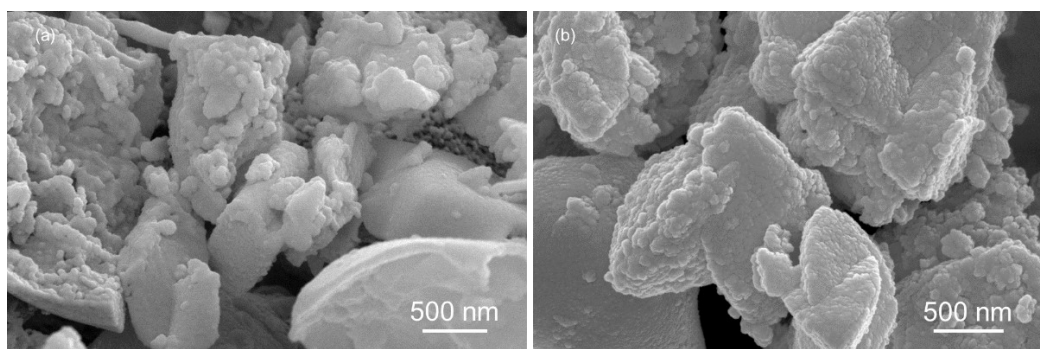

**Fig. S3** FESEM images of fennel-seed derived (a) pristine FSC-700 and (b) KOH activated FSK1-700 carbon samples.

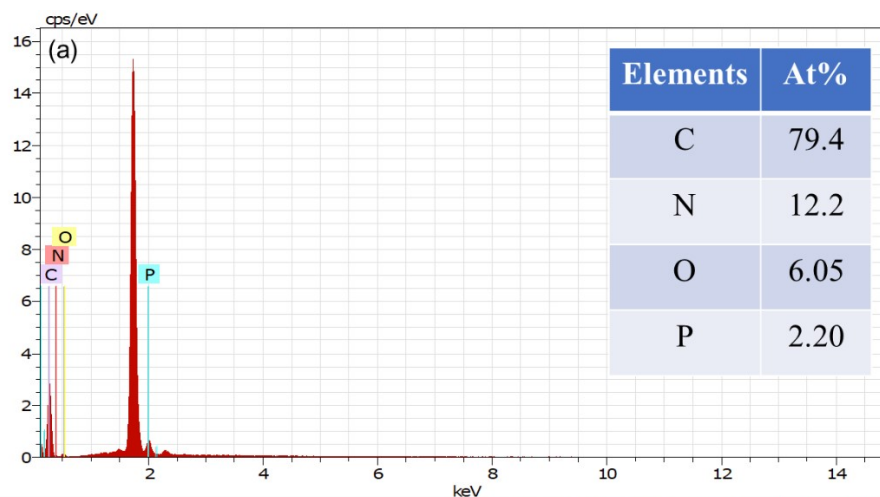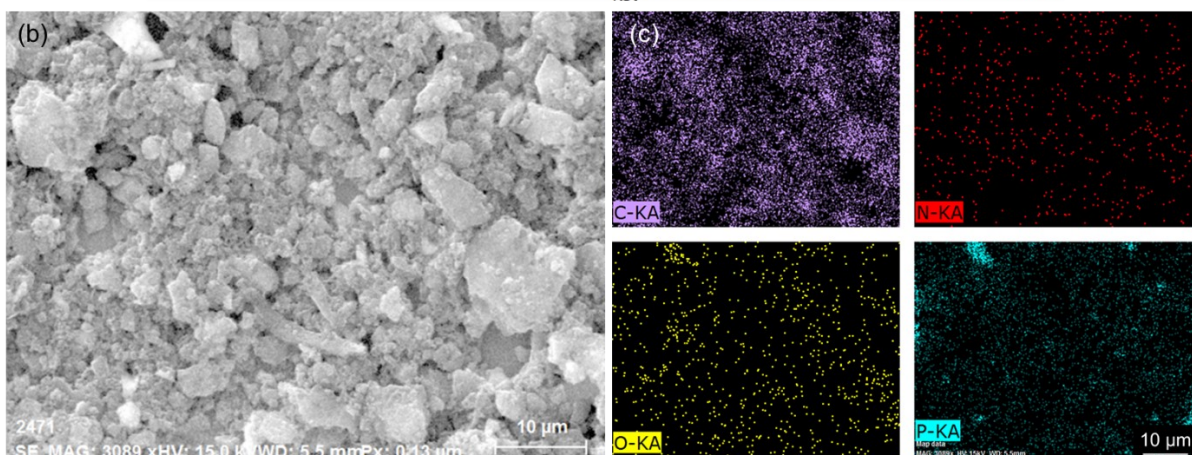

**Fig. S4** (a) EDS spectrum of FSP40-700, (b) mapping region in FESEM, and (c) mapping of different constituent elements, C, N, O, and P.

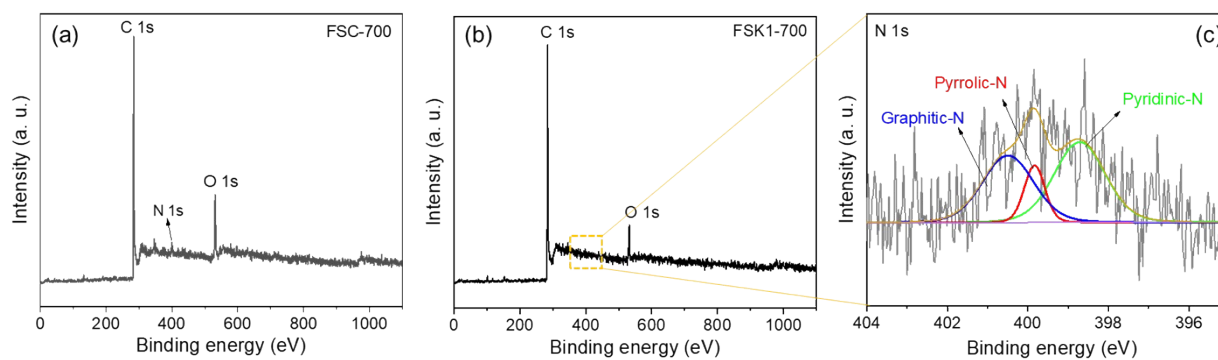

**Fig. S5** XPS survey spectra of (a) FSC-700 and (b) FSK1-700 samples, and (c) high-resolution deconvoluted XPS spectra of N 1s for FSK1-700 sample.

**Table S1.** Atomic percentage of different elements present in different samples estimated using XPS technique -

| Sl. No. | Sample name | C (at. %) | O (at. %) | N (at. %) | P (at. %) |
|---------|-------------|-----------|-----------|-----------|-----------|
| 1.      | FSC-700     | 86.6      | 11.35     | 2.05      | -         |
| 2.      | FSK1-700    | 92.77     | 5.57      | 1.66      | -         |
| 3.      | FSP40-700   | 90.14     | 5.47      | 2.54      | 1.85      |

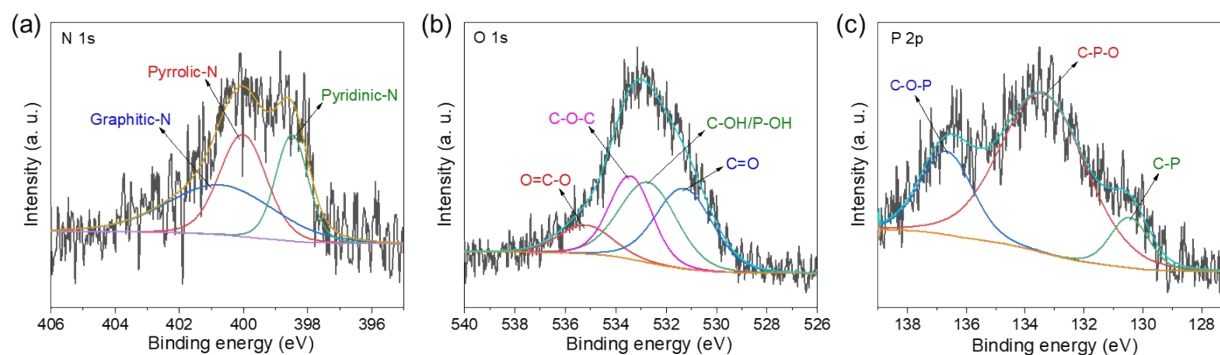

**Fig. S6** High-resolution XPS spectrum of (a) N 1s, (b) O 1s and (c) P 2p for FSP40-700 sample.

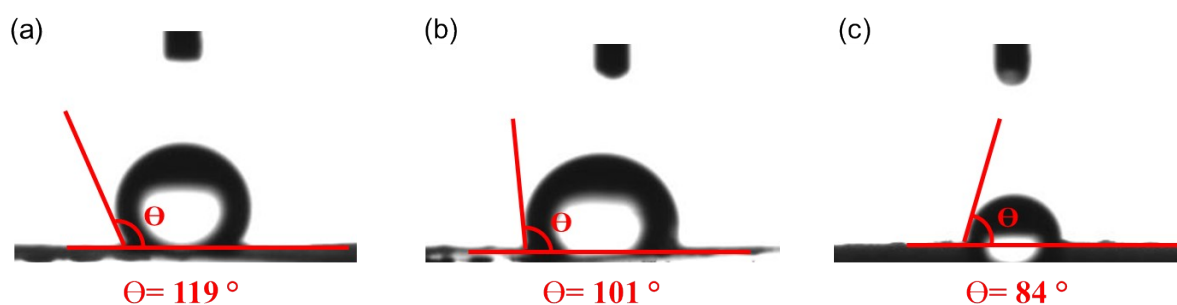

**Fig. S7** Contact angle analysis results of samples: (a) FSC-700, (b) FSK1-700, and (c) FSP40-700.

**Table S2** Specific surface areas (SSA) of KOH-activated porous carbons derived from different biomasses -

| Sl. No. | Carbon precursor                                      | Activating agent | SSA (m <sup>2</sup> /g) | Ref. |
|---------|-------------------------------------------------------|------------------|-------------------------|------|
| 1.      | Lignin                                                | KOH              | 652                     | 1    |
| 2.      | Feather finger grass flower                           | KOH              | 637                     | 2    |
| 3.      | Waste newspaper                                       | KOH              | 416                     | 3    |
| 4.      | Lotus calyx biowaste                                  | KOH              | 798                     | 4    |
| 5.      | Wheat straw cellulosic foam                           | KOH              | 772                     | 5    |
| 6.      | Sorghum waste                                         | KOH              | 948                     | 6    |
| 7.      | Sawdust of Oak, hornbeam, apple, and cherry           | KOH              | 672-912                 | 7    |
| 8.      | Pencil shavings (activated at different temperatures) | KOH              | 598-1293                | 8    |
| 9.      | Bamboo                                                | KOH              | 414                     | 9    |
| 10.     | Waste lemon peels                                     | KOH              | 2276                    | 10   |
| 11.     | Bitter apple pulp                                     | KOH              | 3254                    | 11   |
| 12.     | Coconut shells                                        | KOH              | 3512                    | 12   |

**Table S3** Specific surface area (SSA) and pore volumes of different carbon samples-

| Sl. No. | Sample    | S <sub>BET</sub> (m <sup>2</sup> /g) | Average Pore size (nm) | Pore volume (cm <sup>3</sup> /g) | Micropore S <sub>BET</sub> (m <sup>2</sup> /g) | Meso & macropore S <sub>BET</sub> (m <sup>2</sup> /g) |
|---------|-----------|--------------------------------------|------------------------|----------------------------------|------------------------------------------------|-------------------------------------------------------|
| 1.      | FSC-700   | 24                                   | 8.34                   | 0.05                             | 2.8                                            | 21.2                                                  |
| 2.      | FSK1-700  | 587                                  | 2.60                   | 0.38                             | 191                                            | 396                                                   |
| 3.      | FSP40-700 | 650                                  | 3.66                   | 0.59                             | 140                                            | 510                                                   |

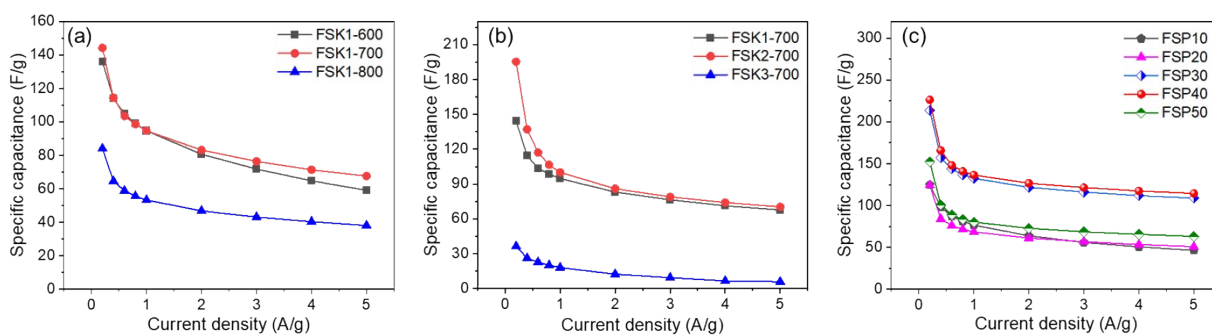

**Fig. S8** Specific capacitance versus current density plots for- (a) carbon samples activated at different temperatures with KOH to FS-powder ratio 1:1; (b) carbon samples activated at 700 °C with different KOH to FS-powder ratios (1:1, 2:1, and 3:1), and (c) carbon samples activated at 700 °C with different H<sub>3</sub>PO<sub>4</sub> concentrations (wt. %) in FS-powder.

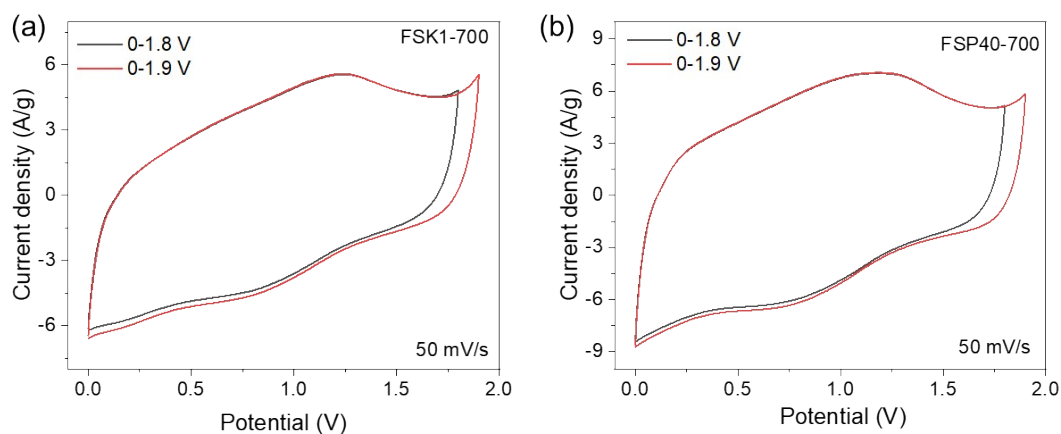

**Fig. S9** CVs of ZIHSC half-cells within different potential windows with: (a) FSK1-700, (b) FSP40-700 cathodes and 2M ZnSO<sub>4</sub> electrolyte.

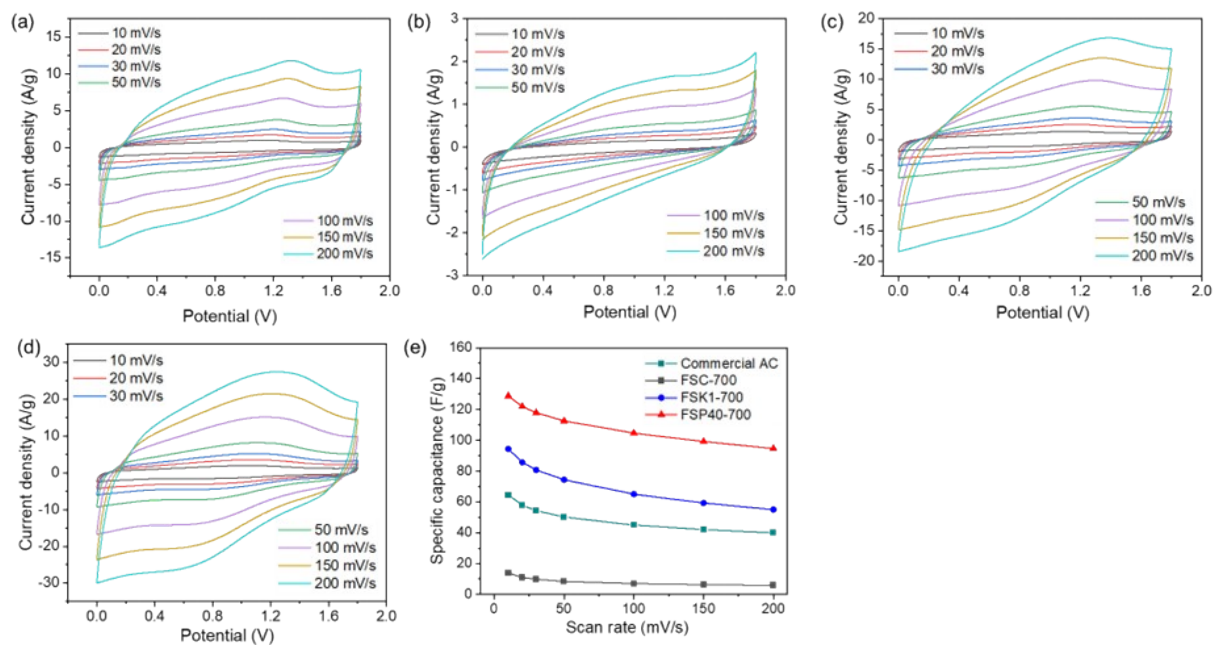

**Fig. S10** Cyclic voltammograms at different scan rates for ZIHSCs with (a) Commercial AC, (b) FSC-700, (c) FSK1-700, (d) FSP40-700 based cathodes; and (e) variation of specific capacitance with scan rates for different carbon materials.

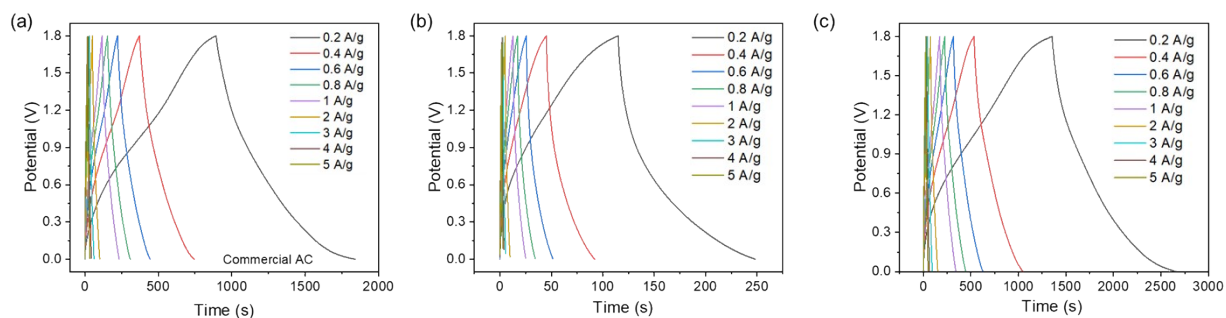

**Fig. S11** GCD profiles at different current densities for ZIHSCs with (a) Commercial AC, (b) FSC-700 and (c) FSK1-700 based cathodes.

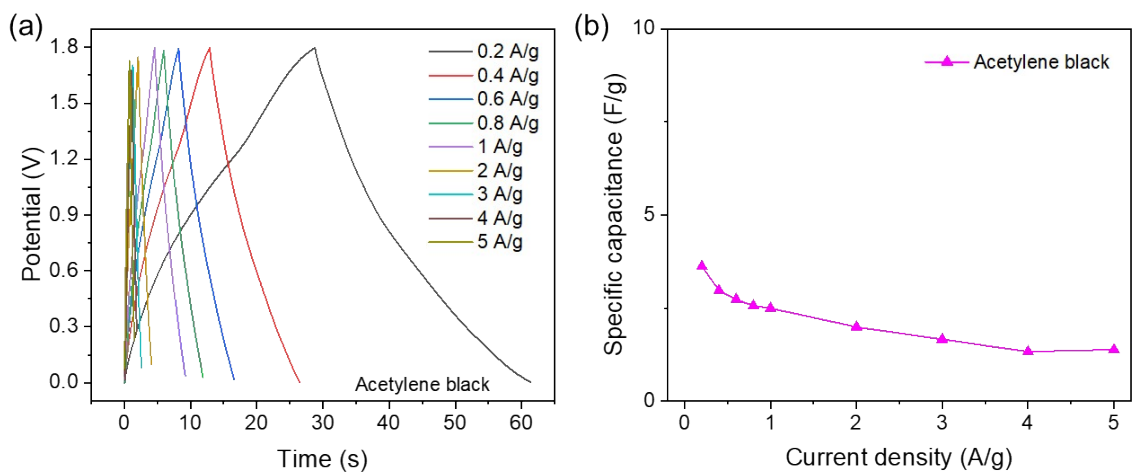

**Fig. S12** For Zn//acetylene black ZIHSC: (a) GCD profiles and (b) Specific capacitance at different current densities.

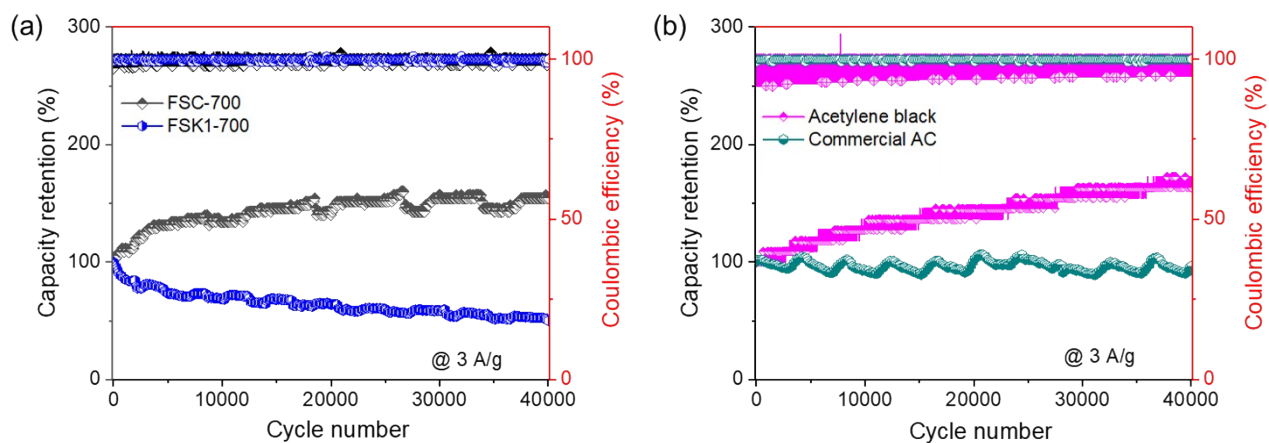

**Fig. S13** Cycling stability of different control samples used to assemble ZIHSCs in this study.

**Table S4** Electrochemical performance comparison of different carbon-based cathode materials in aqueous ZIHSCs-

| Sl. No. | Cathode material                  | Activating agent                                                | SSA (m <sup>2</sup> /g) | Electrolyte                                                    | Potential window (V) | Capacity (mAh/g) | Energy density (Wh/kg) | Power density (kW/kg) | Ref.      |
|---------|-----------------------------------|-----------------------------------------------------------------|-------------------------|----------------------------------------------------------------|----------------------|------------------|------------------------|-----------------------|-----------|
| 1.      | FSP40-700                         | H <sub>3</sub> PO <sub>4</sub>                                  | 650                     | 2M ZnSO <sub>4</sub>                                           | 0-1.8                | 113 (0.2 A/g)    | 102                    | 0.18                  | This work |
| 2.      | FSK1-700                          | KOH                                                             | 587                     | 2M ZnSO <sub>4</sub>                                           | 0-1.8                | 72 (0.2 A/g)     | 64                     | 0.18                  | This work |
| 3.      | BH-4                              | -                                                               | -                       | 2M ZnSO <sub>4</sub>                                           | 0.2-1.8              | 132 (1 A/g)      | 117.5                  | 0.89                  | 13        |
| 4.      | PBC-A900                          | KOH                                                             | 414                     | Zn(CF <sub>3</sub> SO <sub>3</sub> ) <sub>2</sub>              | 0.2-1.8              | 142.8 (1 A/g)    | 114                    | 0.8                   | 9         |
| 5.      | NSCNS                             | K <sub>2</sub> S <sub>2</sub> O <sub>8</sub>                    | 2110                    | 2M ZnSO <sub>4</sub>                                           | 0.2-1.8              | 141.5 (0.1 A/g)  | 113.4                  | 0.075                 | 14        |
| 6.      | N, O-HPC                          | -                                                               | -                       | 2M ZnSO <sub>4</sub>                                           | 0.2-1.8              | 138.5 (0.5 A/g)  | 110                    | 0.138                 | 15        |
| 7.      | HNPC                              | NH <sub>3</sub>                                                 | -                       | 1M ZnSO <sub>4</sub>                                           | 0-1.8                | 177.8 (4.2 A/g)  | 107.3                  | -                     | 16        |
| 8.      | N, S-PCD                          | -                                                               | 924                     | 2M ZnSO <sub>4</sub>                                           | 0.2-1.8              | 133.4 (0.2 A/g)  | 106.7                  | 0.016                 | 17        |
| 9.      | AC-850                            | KOH                                                             | 2156                    | 1M ZnSO <sub>4</sub>                                           | 0-1.8                | 125.7 (1 A/g)    | 104.4                  | 0.095                 | 18        |
| 10.     | NPG                               | -                                                               | 168                     | 1M ZnSO <sub>4</sub>                                           | 0-1.8                | 105.1 (0.5 A/g)  | 94.6                   | 0.44                  | 19        |
| 11.     | AC                                | commercial                                                      | 1923                    | 2M ZnSO <sub>4</sub>                                           | 0.2-1.8              | 121 (0.1 A/g)    | 84                     | -                     | 20        |
| 12.     | PCM-800                           | NaOH                                                            | 477                     | C <sub>6</sub> F <sub>6</sub> O <sub>6</sub> S <sub>2</sub> Zn | 0-1.9                | 113.3 (0.1 A/g)  | 64.9                   | 0.028                 | 21        |
| 13.     | NSPCN-800                         | Na <sub>2</sub> S <sub>2</sub> O <sub>3</sub>                   | 1297                    | 2M ZnSO <sub>4</sub>                                           | 0.2-1.8              | 95.2 (0.1 A/g)   | 59                     | 0.041                 | 22        |
| 14.     | RHC-850                           | Na <sub>2</sub> CO <sub>3</sub> -K <sub>2</sub> CO <sub>3</sub> | 1012                    | 3M Zn(CF <sub>3</sub> SO <sub>3</sub> ) <sub>2</sub>           | 0.1-1.8              | 70.7 (0.2 A/g)   | 58                     | 0.169                 | 23        |
| 15.     | HMFC                              | KOH                                                             | 2637                    | 2M ZnSO <sub>4</sub>                                           | 0.2-1.8              | 132 (0.1 A/g)    | 95.2                   | 0.074                 | 24        |
| 16.     | S-MCF-N                           | -                                                               | -                       | Zn(CF <sub>3</sub> SO <sub>3</sub> ) <sub>2</sub>              | 0.2-1.8              | 92.4 (0.2 A/g)   | 72.4                   | 0.15                  | 25        |
| 17.     | NS-ONC                            | -                                                               | -                       | 2M ZnSO <sub>4</sub>                                           | 0-1.8                | 55.5 (0.5 A/g)   | 50                     | 0.45                  | 26        |
| 18.     | MSCP                              | NaCl-NaNO <sub>3</sub>                                          | 499                     | 2M ZnSO <sub>4</sub>                                           | 0-1.8                | 68.2 (0.68 A/g)  | 36.5                   | 0.376                 | 27        |
| 19.     | BP-H <sub>3</sub> PO <sub>4</sub> | H <sub>3</sub> PO <sub>4</sub>                                  | 218                     | 2M ZnSO <sub>4</sub>                                           | 0-2.0                | 122.7 (0.1 A/g)  | 120                    | 0.11                  | 28        |
| 20.     | BG-H <sub>3</sub> PO <sub>4</sub> | H <sub>3</sub> PO <sub>4</sub>                                  | 129                     | 2M ZnSO <sub>4</sub>                                           | 0.2-1.8              | 138.6 (0.1 A/g)  | 104.6                  | 0.1                   | 29        |
| 21.     | GS-H <sub>3</sub> PO <sub>4</sub> | H <sub>3</sub> PO <sub>4</sub>                                  | 617                     | 2M ZnSO <sub>4</sub>                                           | 0.2-1.8              | 65.2 (0.1 A/g)   | 50.2                   | 0.1                   | 30        |
| 22.     | BAPC1-900                         | KOH                                                             | 3254                    | 2M ZnSO <sub>4</sub>                                           | 0-1.8                | 180 (0.5A/g)     | 162                    | 0.45                  | 11        |
| 23.     | NS-LPC-850                        | KOH                                                             | 2276                    | 6M KOH+0.35M ZnO                                               | 0.4-1.4              | 102 (1 A/g)      | 67                     | 1                     | 10        |

**Table S5** EIS fitted parameters-

| Sl. No. | Sample    | $R_s$ ( $\Omega$ ) | $R_{ct}$ ( $\Omega$ ) |
|---------|-----------|--------------------|-----------------------|
| 1.      | FSC-700   | 4.2                | 484                   |
| 2.      | FSK1-700  | 4.5                | 190                   |
| 3.      | FSP40-700 | 2.7                | 150                   |

### Dunn's method of extracting capacitive and diffusive charges from CVs recorded at different scan rates-

The peak current in the CVs and scan rates obey the following power law:

$$i = av^b$$

Here,  $a$  &  $b$  are two adjustable parameters. A process that stores charge through diffusion-controlled is indicated by  $b = 0.5$ . while a value of  $b = 1$  refers to 'capacitive' processes. The slope of the straight-line plot of  $\log(i)$  versus  $\log(v)$  at different charge-discharge voltages can be used to calculate  $b$ -values. Now, due to the difference in scan rate dependence, the contributions of capacitive and diffusive processes can be mathematically separated. Dunn and coworkers detailed the procedure in the literature.<sup>31,32</sup> To put it succinctly, this technique uses the following equation to simplify the diffusion-controlled and capacitive contributions to the current  $i(V)$  at a given voltage:

$$i(V) = a_1v + a_2v^{1/2}$$

The above equation can be rearranged as follows:

$$i(V)/v^{1/2} = a_1v^{1/2} + a_2$$

The slopes and intercepts,  $a_1$  and  $a_2$ , can now be determined by plotting the straight lines  $i(V)/v^{1/2}$  vs.  $v^{1/2}$  at various voltages. At certain potentials, the current contributions from diffusive ( $a_2v^{1/2}$ ) and capacitive ( $a_1v$ ) processes can then be determined.<sup>33</sup>

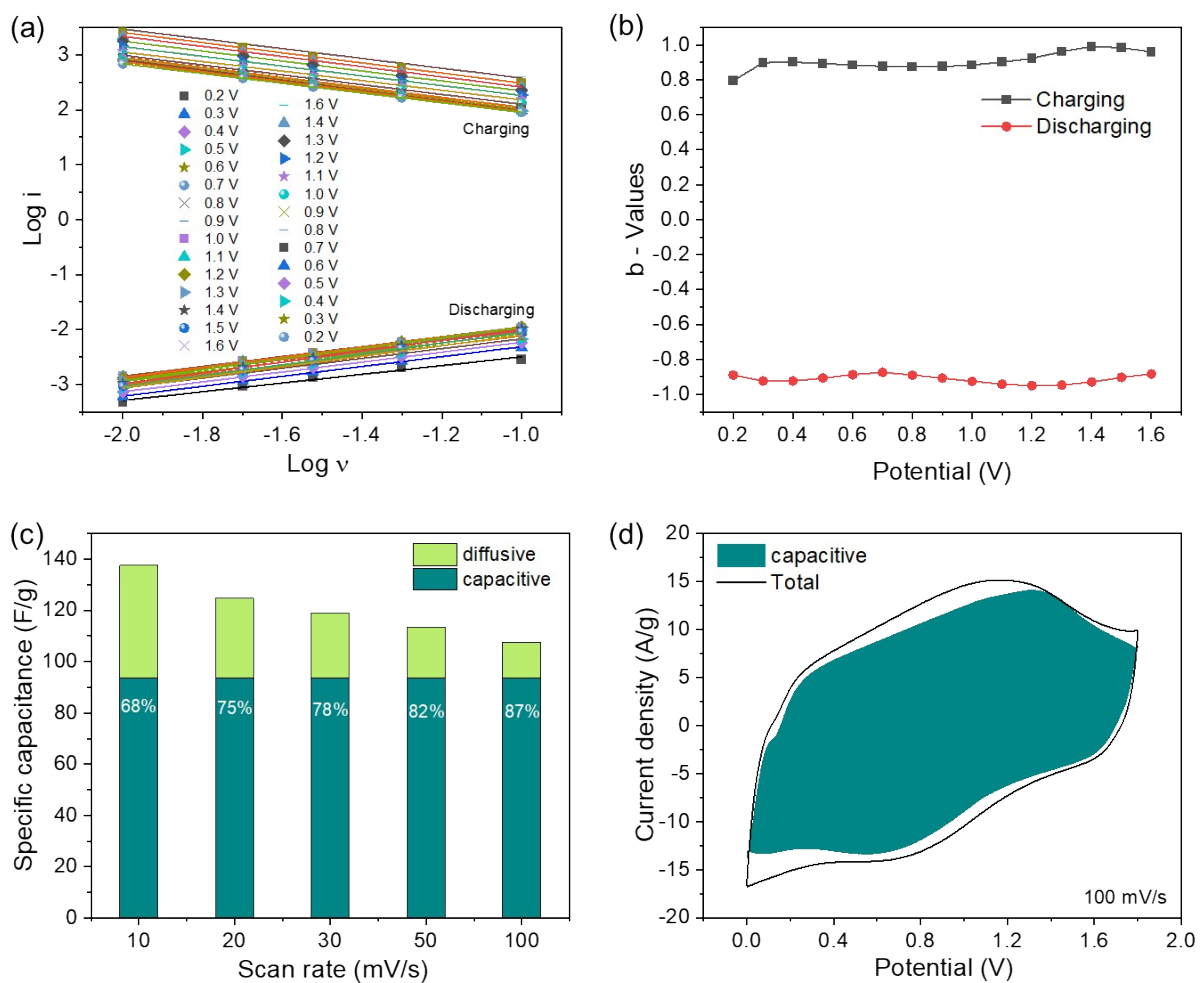

**Fig. S14** Charge storage kinetics analysis of Zn//FSP40-700 based ZIHSC: (a) Log  $i$  vs Log  $v$  plots and (b) evaluated  $b$ -values at different charge-discharge voltages, (c) Segregation of diffusive and capacitive contributions to the total capacitance at different scan rates, and (d) plot of capacitive current to the total current in the CV measured at 100 mV/s.

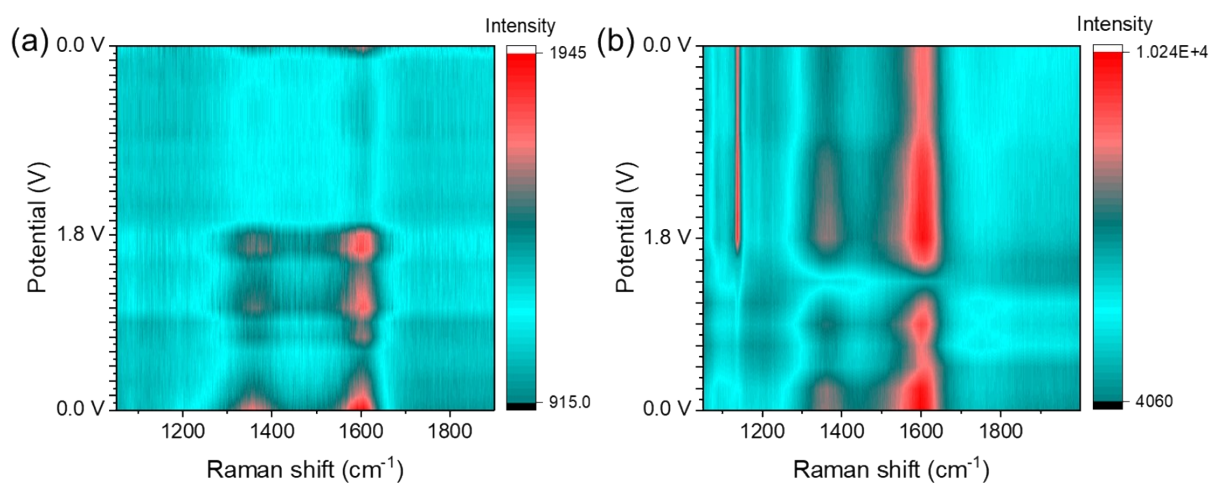

**Fig. S15** In-situ Raman spectral analysis of (a) FSC-700 and (b) FSK1-700 based ZIHSCs with aqueous 2M  $\text{ZnSO}_4$  electrolyte.

**Table S6** Key distances from the optimized complexes (Å)

| Complex                                   | Shortest contact                                                    |
|-------------------------------------------|---------------------------------------------------------------------|
| Pristine graphene + $\text{Zn}^{2+}$      | $\text{Zn}\cdots\text{C} = 3.562$ ; Zn height above C-plane = 3.067 |
| O, N-doped graphene + $\text{Zn}^{2+}$    | $\text{Zn}-\text{O} = 1.99189$                                      |
| O, N, P-doped graphene + $\text{Zn}^{2+}$ | $\text{Zn}-\text{O}(\text{P}) = 1.99126$                            |

**Table S7** Dipole moments of the adsorbed complexes (Debye)

| Complex                                   | Dipole Tot (D) |
|-------------------------------------------|----------------|
| Pristine graphene + $\text{Zn}^{2+}$      | 4.3054         |
| O, N-doped graphene + $\text{Zn}^{2+}$    | 7.0754         |
| O, N, P-doped graphene + $\text{Zn}^{2+}$ | 7.6928         |

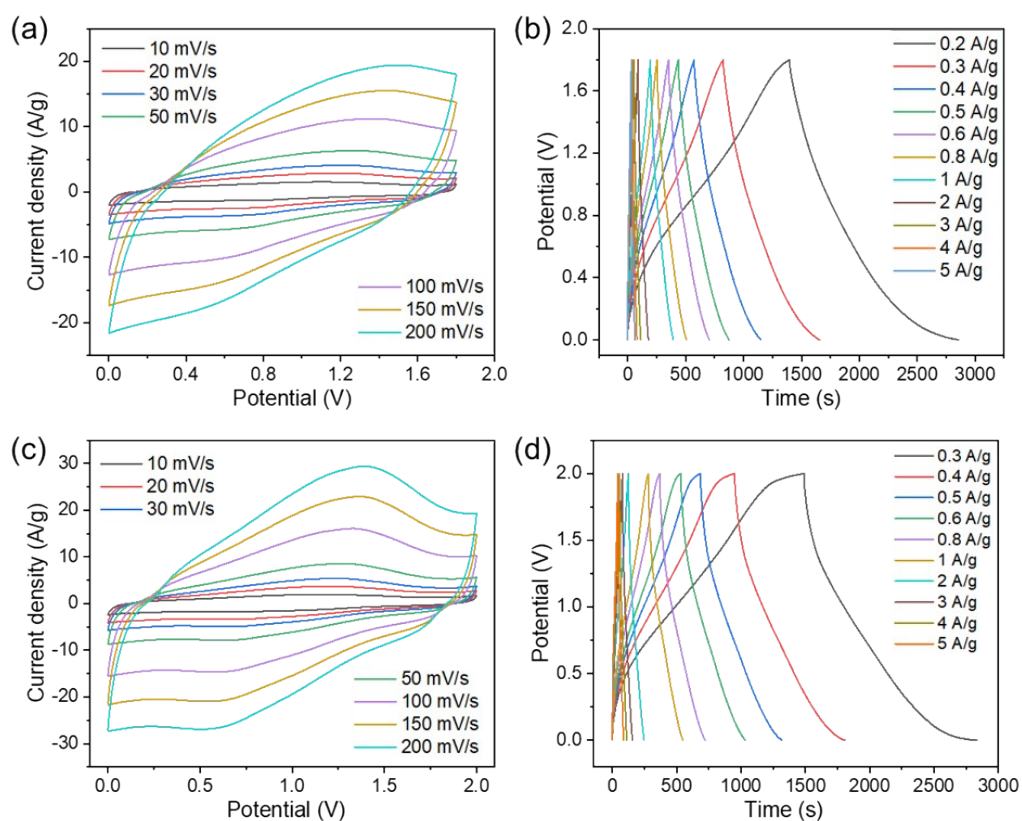

**Fig. S16** CVs at different scan rates and GCD profiles at different current densities recorded for f-ZIHSC within (a-b) 0-1.8 V and (c-d) 0-2.0 V voltage windows.

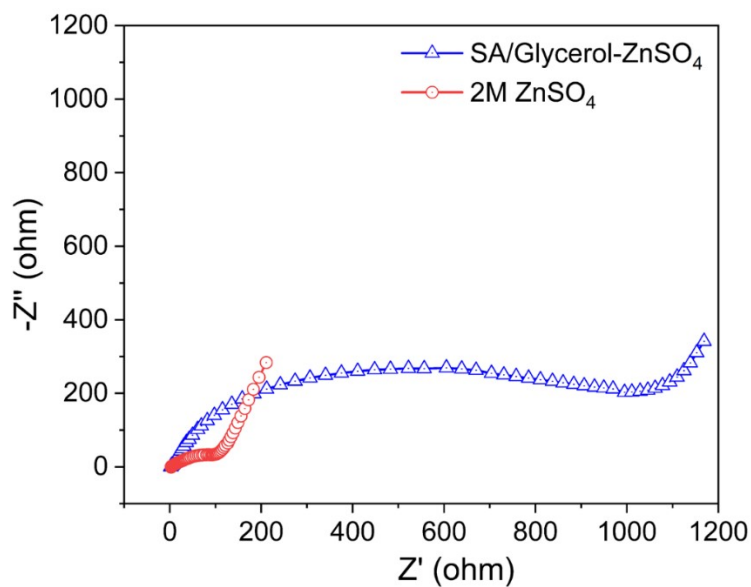

**Fig. S17** EIS comparison of aqueous and hydrogel-based ZIHSCs.

**Table S8** Electrochemical performance comparison of FSP40-700-based flexible ZIHSC (f-ZIHSC) device with other carbon-based f-ZIHSC systems reported in recent literatures-

| Sl. No. | Cathode material | Electrolyte                                                     | Potential window (V) | Capacity (mAh/g) | Energy density (Wh/kg) | Power density (kW/kg) | Ref.      |
|---------|------------------|-----------------------------------------------------------------|----------------------|------------------|------------------------|-----------------------|-----------|
| 1.      | FSP-40-700       | SA/Glycerol-ZnSO <sub>4</sub> gel                               | 0-1.8                | 69 @ 0.3 A/g     | 72.9                   | 0.18                  | This work |
| 2.      | FSP-40-700       | SA/Glycerol-ZnSO <sub>4</sub> gel                               | 0-2.0                | 123 @ 0.3 A/g    | 123                    | 0.33                  | This work |
| 3.      | HCS              | PAM hydrogel                                                    | 0.15-1.95            | 86 @ 0.5 A/g     | 59.7                   | 0.44                  | 34        |
| 4.      | BC-CNa           | PAM gel                                                         | 0.2-1.8              | 48 @ 0.2 A/g     | 35.9                   | 0.14                  | 35        |
| 5.      | CNPK             | PVA/ZnAC <sub>2</sub> /KOH gel                                  | 0.2-1.8              | 141 @ 0.1 A/g    | 89.3                   | 0.079                 | 36        |
| 6.      | NPFC             | Zn(CF <sub>3</sub> SO <sub>3</sub> ) <sub>2</sub> /PAM hydrogel | -                    | 163..6 @ 0.1 A/g | 60.1                   | 0.074                 | 37        |
| 7.      | WC-6ZnN-12U      | PAM-ZnSO <sub>4</sub>                                           | 0.2-1.8              | 34.6 @ 0.1 A/g   | 27.7                   | 0.035                 | 38        |
| 8.      | LDC              | Gelatin/ZnSO <sub>4</sub> gel                                   | 0.2-1.8              | 116.8 @ 0.5 A/g  | 86.8                   | 0.42                  | 39        |
| 9.      | PBC-A900         | PVA-Zn(CF <sub>3</sub> SO <sub>3</sub> ) <sub>2</sub>           | 0.2-1.8              | 155 @ 0.8 A/g    | 107                    | 0.8                   | 8         |

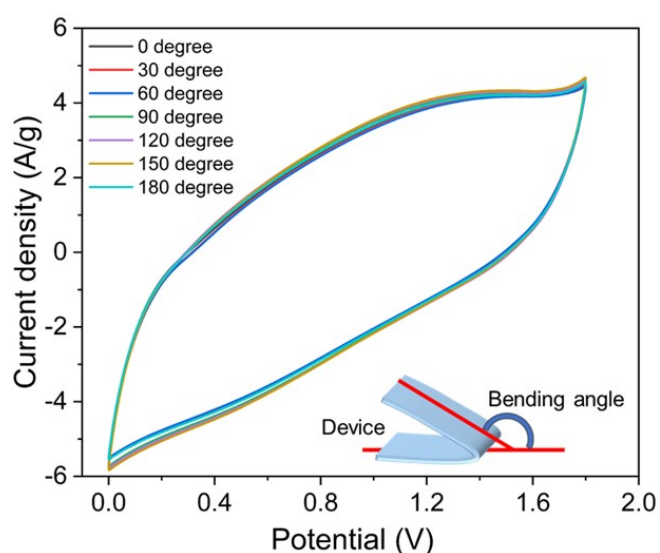

**Fig. S18** CV curves recorded at different bending angles of the assembled gel-electrolyte-based f-ZIHSC with FSP40-700 as cathode material.

## References

1. C. Li, Y. Li, Y. Shao, L. Zhang, S. Zhang, S. Wang, B. Li, Z. Cui, Y. Tang and X. Hu, *Green Chemistry*, 2023, **25**, 2825-2839.
2. R. A. Senthil, V. Yang, J. Pan and Y. Sun, *J. Energy Storage*, 2021, **35**, 102287.
3. D. Kalpana, S. H. Cho, S. B. Lee, Y. S. Lee, R. Misra and N. G. Renganathan, *J. Power Sources*, 2009, **190**, 587-591.
4. G. Dhakal, D. Mohapatra, Y.-I. Kim, J. Lee, W. K. Kim and J.-J. Shim, *Renewable Energy*, 2022, **189**, 587-600.
5. G. Gou, F. Huang, M. Jiang, J. Li and Z. Zhou, *Renewable Energy*, 2020, **149**, 208-216.
6. J. Hou, Y. Liu, S. Wen, W. Li, R. Liao and L. Wang, *ACS Omega*, 2020, **5**, 13548-13556.
7. K. Jedynak and B. Charmas, *Adsorption*, 2024, **30**, 167-183.
8. Z. Li, D. Chen, Y. An, C. Chen, L. Wu, Z. Chen, Y. Sun and X. Zhang, *Energy Storage Mater.*, 2020, **28**, 307-314.
9. J. Wang, Y. Huang, X. Han, Z. Li, S. Zhang and M. Zong, *Appl. Surf. Sci.*, 2022, **579**, 152247.
10. F. Ullah, I. Shahid, Y. Sun, R. Andavar, U. A. Kolachi, Z. Zhu and J. Pan, *Nanoscale*, 2025, **17**, 27011-27024.
11. H. Gupta, H. K. Rathore, M. Kumar, P. W. Menezes and D. Sarkar, *Small*, 2025, **21**, 2502071.
12. B. Hou, T. Zhang, R. Yan, D. Li, Y. Mo, L. Yin and Y. Chen, *Int. J. Electrochem. Sci.*, 2016, **11**, 9007-9018.
13. H. Fan, S. Zhou, Q. Li, G. Gao, Y. Wang, F. He, G. Hu and X. Hu, *J. Colloid Interface Sci.*, 2021, **600**, 681-690.
14. D. Wang, S. Wang and J. Sun, *Biomass Conv. Bioref.*, 2024, **14**, 7031-7043.
15. X. Deng, J. Li, Z. Shan, J. Sha, L. Ma and N. Zhao, *J. Mater. Chem. A*, 2020, **8**, 11617-11625.
16. H. Zhang, Q. Liu, Y. Fang, C. Teng, X. Liu, P. Fang, Y. Tong and X. Lu, *Adv. Mater.*, 2019, **31**, 1904948.
17. Y. Yang, D. Chen, H. Wang, P. Ye, Z. Ping, J. Ning, Y. Zhong and Y. Hu, *Chem. Eng. J.*, 2022, **431**, 133250.
18. J. Yu, L. Wang, J. Peng, X. Jia, L. Zhou, N. Yang and L. Li, *Ionics*, 2021, **27**, 4495-4505.

19. Y. Zhao, H. Hao, T. Song, X. Wang, C. Li and W. Li, *J. Power Sources*, 2022, **521**, 230941.
20. L. Dong, X. Ma, Y. Li, L. Zhao, W. Liu, J. Cheng, C. Xu, B. Li, Q.-H. Yang and F. Kang, *Energy Storage Mater.*, 2018, **13**, 96-102.
21. X. Zhang, E. Cao, Y. Tian, M. Zhang, X. Liu, Z. Lei, Z. Zhao, P. Cui, Q. Ling and R. Xie, *Carbon Resour. Convers.*, 2022, **5**, 193-199.
22. P. Song, C. Li, N. Zhao, Z. Ji, L. Zhai, X. Shen and Q. Liu, *J. Colloid Interface Sci.*, 2023, **633**, 362-373.
23. Y. Liu, H. Tan, Z. Tan and X. Cheng, *Appl. Surf. Sci.*, 2023, **608**, 155215.
24. F. Kang, Y. Li, Z. Zheng, X. Peng, J. Rong and L. Dong, *J. Colloid Interface Sci.*, 2024, **669**, 766-774.
25. J. Hong and C. Jo, *J. Power Sources*, 2024, **594**, 234006.
26. R. Aggarwal, H. Gupta, K. Awasthi, M. Kumar, D. Sarkar and S. K. Sonkar, *Langmuir*, 2024, **40**, 9481-9489.
27. S. Zeng, X. Shi, D. Zheng, C. Yao, F. Wang, W. Xu and X. Lu, *Mater. Res. Bull.*, 2021, **135**, 111134.
28. M. Gautam, T. Patodia, V. Gupta, K. Sachdev and H. S. Kushwaha, *J. Energy Storage*, 2024, **102**, 114088.
29. M. Gautam, T. Patodia, K. Sachdev and H. S. Kushwaha, *Biomass Conv. Bioref.*, 2025, **15**, 6389-6400.
30. M. Gautam, T. Patodia, P. Kushwaha, M. Agrawal, K. Sachdev and H. S. Kushwaha, *Carbon Trends*, 2024, **15**, 100341.
31. H.-S. Kim, J. B. Cook, H. Lin, Jesse S. Ko, Sarah H. Tolbert, V. Ozolins and B. Dunn, *Nat. Mater.*, 2017, **16**, 454-460.
32. J. Wang, J. Polleux, J. Lim and B. Dunn, *J. Phys. Chem. C*, 2007, **111**, 14925-14931.
33. D. Sarkar, D. Das, S. Das, A. Kumar, S. Patil, K. K. Nanda, D. D. Sarma and A. Shukla, *ACS Energy Lett.*, 2019, **4**, 1602-1609.
34. S. Chen, L. Ma, K. Zhang, M. Kamruzzaman, C. Zhi and J. A. Zapien, *J. Mater. Chem. A*, 2019, **7**, 7784-7790.
35. H. Chen, Y. Zheng, X. Zhu, W. Hong, Y. Tong, Y. Lu, G. Pei, Y. Pang, Z. Shen and C. Guan, *Mater. Res. Bull.*, 2021, **139**, 111281.
36. H. Zhang, Z. Chen, Y. Zhang, Z. Ma, Y. Zhang, L. Bai and L. Sun, *J. Mater. Chem. A*, 2021, **9**, 16565-16574.
37. F. Wei, Y. Wei, J. Wang, M. Han and Y. Lv, *Chem. Eng. J.*, 2022, **450**, 137919.

38. G. Lou, G. Pei, Y. Wu, Y. Lu, Y. Wu, X. Zhu, Y. Pang, Z. Shen, Q. Wu, S. Fu and H. Chen, *Chem. Eng. J.*, 2021, **413**, 127502.
39. Y. Lu, Z. Li, Z. Bai, H. Mi, C. Ji, H. Pang, C. Yu and J. Qiu, *Nano Energy*, 2019, **66**, 104132.
